# Supplementary material for: The effect of the salinity, light regime and food source on carbon and nitrogen uptake in a benthic foraminifer
Source: Copernicus journal article supplement (doi:10.5194/bg-18-1395-2021), 2021-02-23
Supplement: Supplementary file 1 [file bg-18-1395-2021-supplement.pdf]

Supplement of Biogeosciences, 18, 1395–1406, 2021  
<https://doi.org/10.5194/bg-18-1395-2021-supplement>  
© Author(s) 2021. This work is distributed under  
the Creative Commons Attribution 4.0 License.

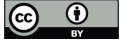

*Supplement of*

## **The effect of the salinity, light regime and food source on carbon and nitrogen uptake in a benthic foraminifer**

**Michael Lintner et al.**

*Correspondence to:* Michael Lintner ([michael.lintner@univie.ac.at](mailto:michael.lintner@univie.ac.at))

The copyright of individual parts of the supplement might differ from the CC BY 4.0 License.

Experiment salinity:

| species   | salinity | time point | pC       | pN       |
|-----------|----------|------------|----------|----------|
| Elphidium | 15       | 3          | 0,055907 | 0,023245 |
| Elphidium | 15       | 3          | 0,035021 | 0,017169 |
| Elphidium | 15       | 3          | 0,02413  | 0,016542 |
| Elphidium | 20       | 3          | 0,043868 | 0,019613 |
| Elphidium | 20       | 3          | 0,116166 | 0,035625 |
| Elphidium | 20       | 3          | 0,061421 | 0,02162  |
| Elphidium | 25       | 3          | 0,041021 | 0,017064 |
| Elphidium | 25       | 3          | 0,147469 | 0,038485 |
| Elphidium | 25       | 3          | 0,030681 | 0,013827 |
| Elphidium | 15       | 5          | 0,04084  | 0,017772 |
| Elphidium | 15       | 5          | 0,056066 | 0,025746 |
| Elphidium | 15       | 5          | 0,041981 | 0,01915  |
| Elphidium | 20       | 5          | 0,186058 | 0,059763 |
| Elphidium | 20       | 5          | 0,081774 | 0,037638 |
| Elphidium | 20       | 5          | 0,071696 | 0,026958 |
| Elphidium | 25       | 5          | 0,089844 | 0,029494 |
| Elphidium | 25       | 5          | 0,029852 | 0,018674 |
| Elphidium | 25       | 5          | 0,044453 | 0,017431 |
| Elphidium | 15       | 7          | 0,047667 | 0,032817 |
| Elphidium | 15       | 7          | 0,043547 | 0,022973 |
| Elphidium | 15       | 7          | 0,049076 | 0,031648 |
| Elphidium | 20       | 7          | 0,054555 | 0,063218 |
| Elphidium | 20       | 7          | 0,064183 | 0,07543  |
| Elphidium | 20       | 7          | 0,041045 | 0,039021 |
| Elphidium | 25       | 7          | 0,058364 | 0,007457 |
| Elphidium | 25       | 7          | 0,046655 | 0,008975 |
| Elphidium | 25       | 7          | 0,021453 | 0,004795 |

Experiment food source:

| species  | salinity | time point | pC       | pN       |
|----------|----------|------------|----------|----------|
| E_diatom | 15       | 5          | 0,197788 | 0,027851 |
| E_diatom | 15       | 5          | 0,086905 | 0,009065 |
| E_diatom | 15       | 5          | 0,084442 | 0,012569 |
| E_diatom | 20       | 5          | 0,068787 | 0,009646 |
| E_diatom | 20       | 5          | 0,084681 | 0,011122 |
| E_diatom | 20       | 5          | 0,109619 | 0,015915 |
| E_diatom | 25       | 5          | 0,007772 | 0,009754 |
| E_diatom | 25       | 5          | 0,005471 | 0,008341 |
| E_diatom | 25       | 5          | 0,010074 | 0,018316 |
| E_green  | 15       | 5          | 0,04084  | 0,017772 |
| E_green  | 15       | 5          | 0,056066 | 0,025746 |
| E_green  | 15       | 5          | 0,041981 | 0,01915  |

|         |    |   |          |          |
|---------|----|---|----------|----------|
| E_green | 20 | 5 | 0,186058 | 0,059763 |
| E_green | 20 | 5 | 0,081774 | 0,037638 |
| E_green | 20 | 5 | 0,071696 | 0,026958 |
| E_green | 25 | 5 | 0,089844 | 0,029494 |
| E_green | 25 | 5 | 0,029852 | 0,018674 |
| E_green | 25 | 5 | 0,044453 | 0,017431 |

Experiment light-dark:

| species | salinity | time point | pC       | pN       |
|---------|----------|------------|----------|----------|
| E_dark  | 20       | 3          | 0,01209  | 0,014268 |
| E_dark  | 20       | 3          | 0,050814 | 0,045288 |
| E_dark  | 20       | 3          | 0,0386   | 0,023667 |
| E_dark  | 20       | 5          | 0,035637 | 0,022537 |
| E_dark  | 20       | 5          | 0,009258 | 0,011141 |
| E_dark  | 20       | 5          | 0,029668 | 0,027962 |
| E_dark  | 20       | 7          | 0,017234 | 0,030899 |
| E_dark  | 20       | 7          | 0,009675 | 0,022814 |
| E_dark  | 20       | 7          | 0,040322 | 0,036438 |
| E_light | 20       | 3          | 0,043868 | 0,019613 |
| E_light | 20       | 3          | 0,116166 | 0,035625 |
| E_light | 20       | 3          | 0,061421 | 0,02162  |
| E_light | 20       | 5          | 0,186058 | 0,059763 |
| E_light | 20       | 5          | 0,081774 | 0,037638 |
| E_light | 20       | 5          | 0,071696 | 0,026958 |
| E_light | 20       | 7          | 0,054555 | 0,063218 |
| E_light | 20       | 7          | 0,064183 | 0,07543  |
| E_light | 20       | 7          | 0,041045 | 0,039021 |

Experiment starving:

| species   | salinity | time point | pC       | pN       |
|-----------|----------|------------|----------|----------|
| Elphidium | 20       | 1          | 0,023239 | 0,007855 |
| Elphidium | 20       | 1          | 0,008671 | 0,005605 |
| Elphidium | 20       | 1          | 0,009123 | 0,005985 |
| Elphidium | 20       | 3          | 0,023001 | 0,008688 |
| Elphidium | 20       | 3          | 0,012776 | 0,005595 |
| Elphidium | 20       | 3          | 0,045477 | 0,013695 |
| Elphidium | 20       | 5          | 0,01187  | 0,007959 |
| Elphidium | 20       | 5          | 0,013934 | 0,008852 |
| Elphidium | 20       | 5          | 0,042959 | 0,004395 |
| Elphidium | 20       | 7          | 0,051232 | 0,025611 |
| Elphidium | 20       | 7          | 0,057722 | 0,022056 |
| Elphidium | 20       | 7          | 0,018362 | 0,012186 |
